# Supplementary material for: LRP10 and α-synuclein transmission in Lewy body diseases
Source: Springer Nature journal article supplement (doi:10.1007/s00018-024-05135-0), 2024-02-05
Supplement: MOESM1 [file 18_2024_5135_MOESM1_ESM.pdf]

# LRP10 and $\alpha$ -synuclein transmission in Lewy body diseases

Ana Carreras Mascaró<sup>1</sup>, Martyna M. Grochowska<sup>1</sup>, Valerie Boumeester<sup>1</sup>, *et al.*

## SUPPLEMENTARY MATERIAL

ATGCTGTTGGCCACCCTCCTCCTCCTCCTCCTTGGAGGCGCTCTGGCCCATCCAGA  
CCGGATTATTTTCCAAATCATGCTTGTGAGGACCCCCAGCAGTGCTCTTAGAA  
GTGCAGGGCACCTTACAGAGGCCCCTGGTCCGGGACAGCCGCACCTCCCCTGCCA  
ACTGCACCTGGCTCATCCTGGGCAGCAAGGAACAGACTGTCACCATCAGGTTCCA  
GAAGCTACACCTGGCCTGTGGCTCAGAGCGCTTAACCCTACGCTCCCCTCTCCAG  
CCACTGATCTCCCTGTGTGAGGCACCTCCCAGCCCTCTGCAGCTGCCCCGGGGGCA  
ACGTCACCATCACTTACAGCTATGCTGGGGCCAGAGCACCCATGGGGCCAGGGCTT  
CCTGCTCTCCTACAGCCAAGATTGGCTGATGTGCCTGCAGGAAGAGTTTCAGTGC  
CTGAACCACCGCTGTGTATCTGCTGTCCAGCGCTGTGATGGGGTTGATGCCTGTG  
GCGATGGCTCTGATGAAGCAGCATCTTTGCCCCCCTCTCCCGGATGGAGGCTGAG  
ATTGTGCAGCAGCAGGCACCCCCTTCCTACGGGCAGCTCATTGCCAGGGTGCCA  
TCCCACCTGTAG

**Supplementary resource 1: sequence encoding for LRP10<sup>splice</sup>.**

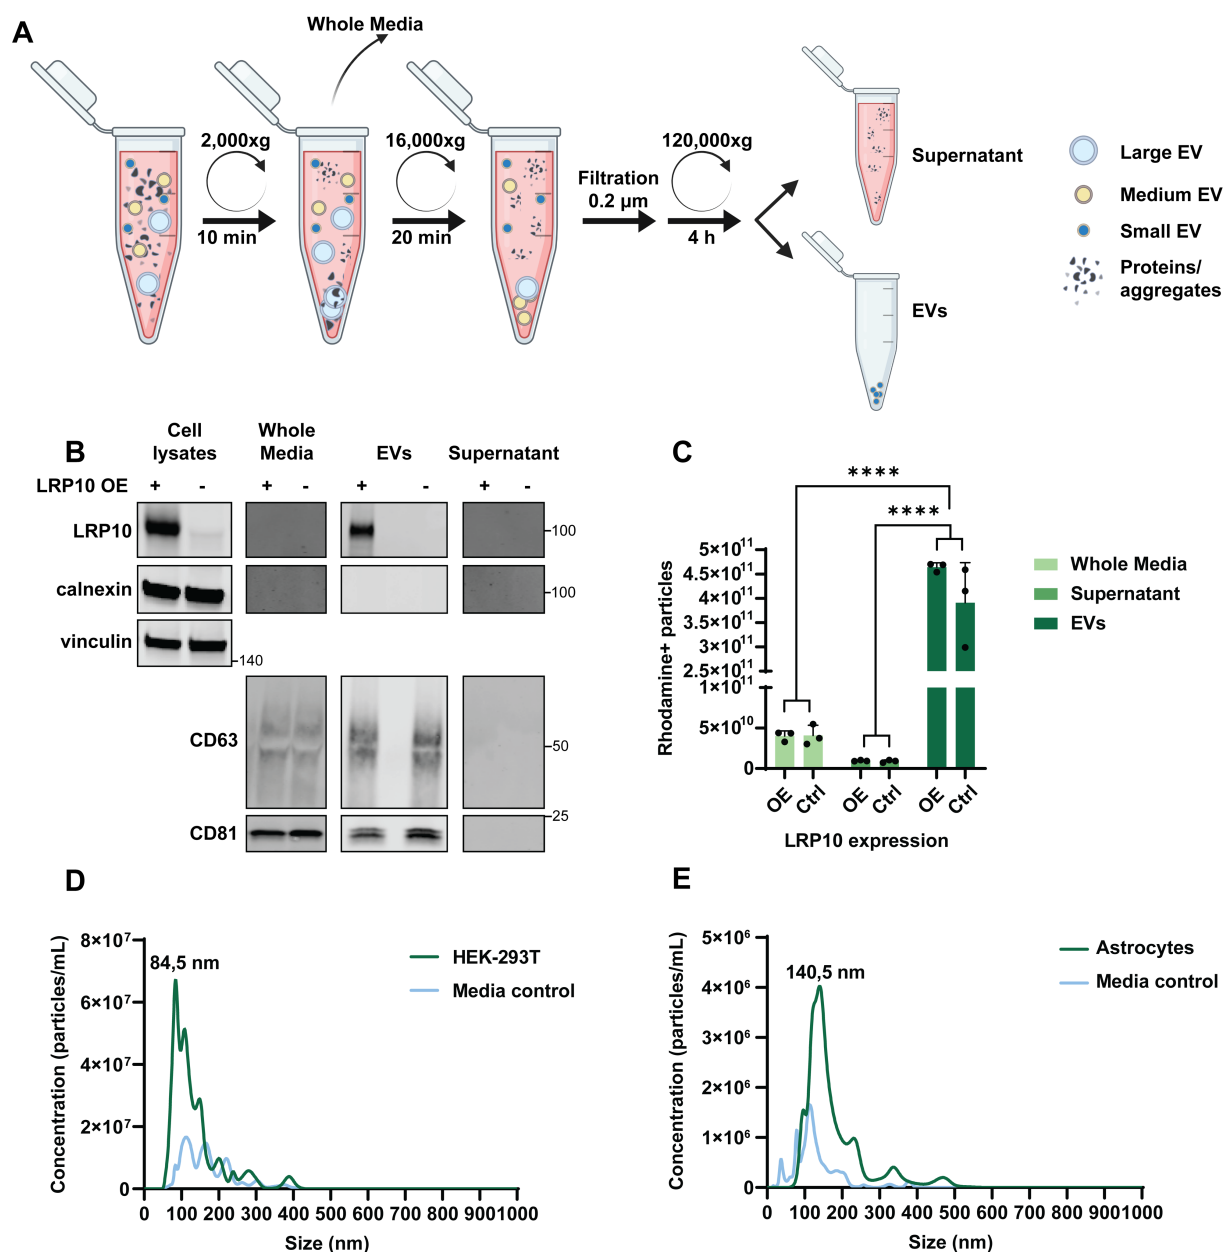

**Supplementary Figure 1: Extracellular vesicles (EVs) isolation protocol and quality control.** (A) Schematic of the ultracentrifugation and filtration protocol for EVs isolation from conditioned media. (B) Representative western blot probed for calnexin, vinculin, CD63, and CD81 in different media fractions from LRP10-overexpressing (OE) and control (Ctrl) HEK-293T cells. (C) EVQuant of Rhodamine-positive particles in different fractions resulting from the EVs isolation protocol. N = 3 biological replicates. (D-E) Nanoparticle tracking analysis showing concentration and diameter sizes (nm) of isolated EVs from HEK-293T cells (D), iPSC-derived astrocytes (E), or control media that has not been in contact with cultured cells. All data are expressed as mean  $\pm$  SD with individual data points shown in (C). Data were analysed by Two-way ANOVA with Sidak's multiple comparisons test. \*\*\*\* $P \leq 0.0001$ .



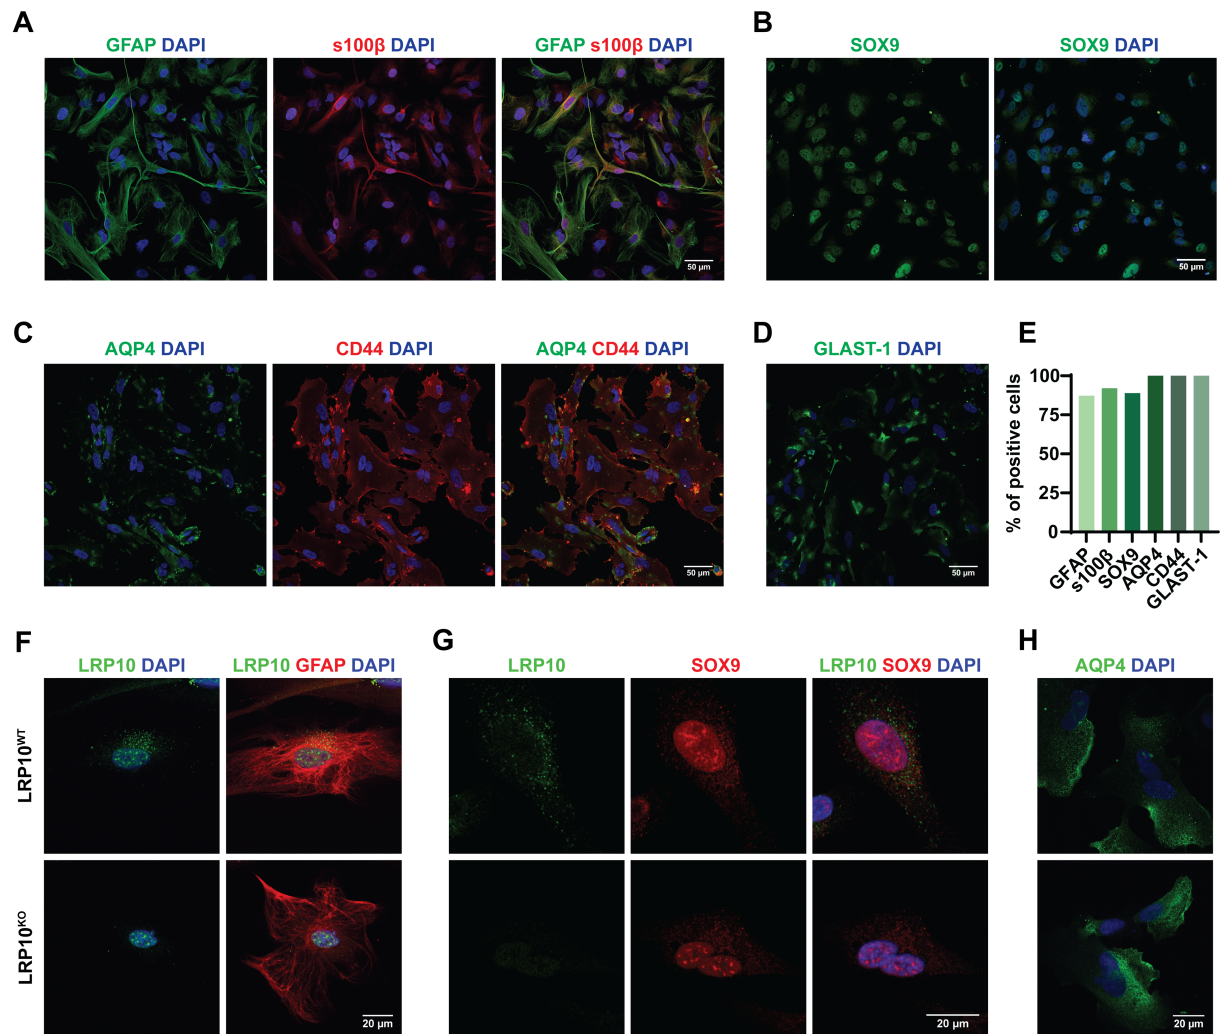

**Supplementary Figure 2: Characterisation of control and LRP10<sup>KO</sup> iPSC-derived astrocytes.** (A-D) Representative confocal images of 4 months-old control-2 iPSC-derived astrocytes stained for the astrocytic markers GFAP and s100β (A), SOX9 (B), AQP4 and CD44 (C), and GLAST-1 (D). (E) Quantification of % of positive cells for the specified markers from (A-D). (F-H) Characterisation of wild-type LRP10 (LRP10<sup>WT</sup>) and LRP10 KO (LRP10<sup>KO</sup>) astrocytes, immunostained for the presence of LRP10 together with GFAP (F), LRP10 together with SOX9 (G), and AQP4 (H). The antibody raised against the C-terminal domain of LRP10 was used in (F).

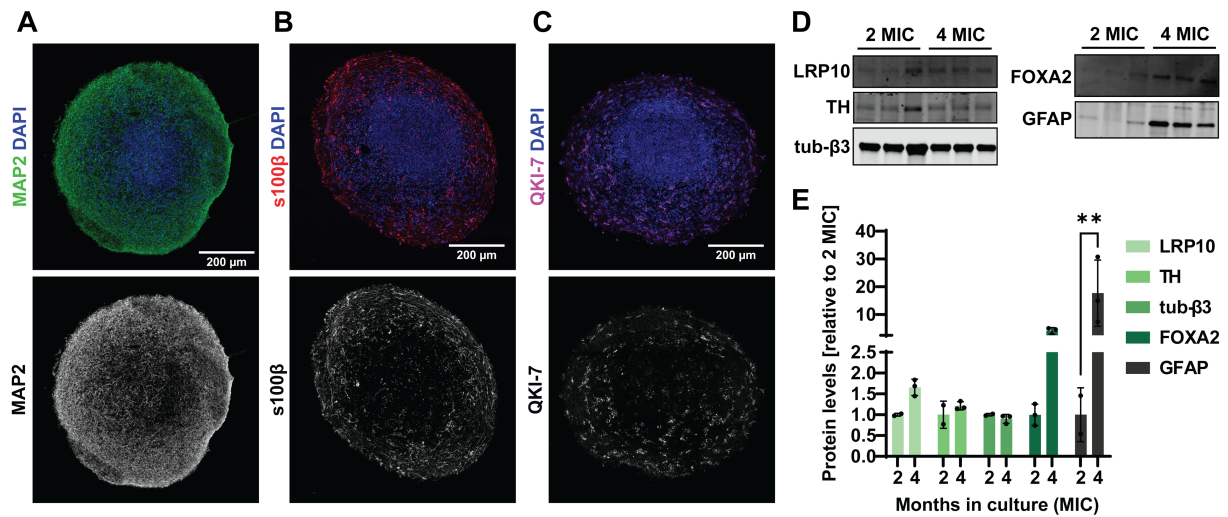

**Supplementary Figure 3: Characterisation of control brain organoids.** (A-C) Representative tile scans of 2 months-old control-1 brain organoids showing MAP2 (A), s100β (B), and QKI-7 (C) immunostainings. (D) Representative western blot of 2 and 4 months-old (months in culture, MIC) control-1 brain organoids. Blots were probed for expression of LRP10, TH, tubulin β3 (tub-β3), FOXA2 and GFAP. (E) Western blot quantification of the indicated markers relative to 2 MIC. N = 3 brain organoids per condition. All data are expressed as mean ± SD with individual data points shown. Data were analysed by Two-way ANOVA with Sidak's multiple comparisons test. \*\* $P \leq 0.01$ .

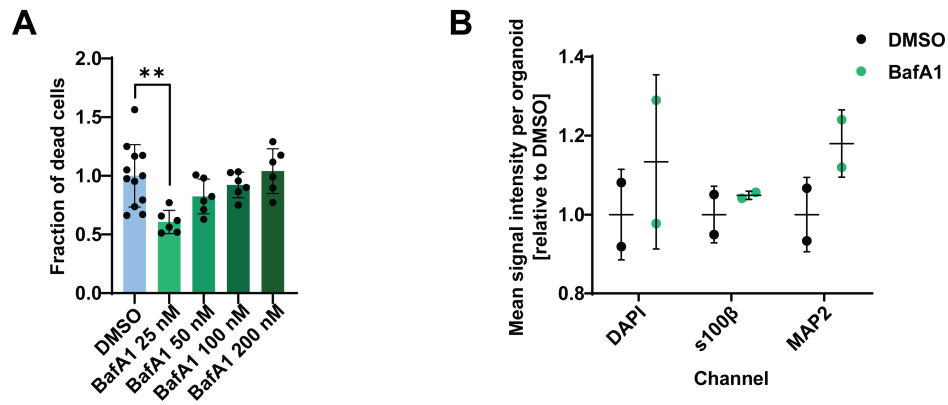

**Supplementary Figure 4: Assessment of BafA1-induced toxicity.** (A) Lactate dehydrogenase (LDH) assay of HEK-293T cells treated for 6 h with DMSO or different concentrations of BafA1 indicating the proportion of dead cells. N = 12 or 6 technical replicates. (B) Quantification of mean signal intensity of each marker (DAPI, s100β, and MAP2) per organoid from Fig. 3C treated with DMSO or 200 nM BafA1 for 4 h. N = 2 brain organoids per treatment. All data are expressed as mean ± SD with individual data points shown. Data in (A) were analysed by One-way ANOVA with Dunnett's multiple comparisons test. Data in (B) were analysed by Two-way ANOVA with Sidak's multiple comparisons test. \*\* $P \leq 0.01$ .

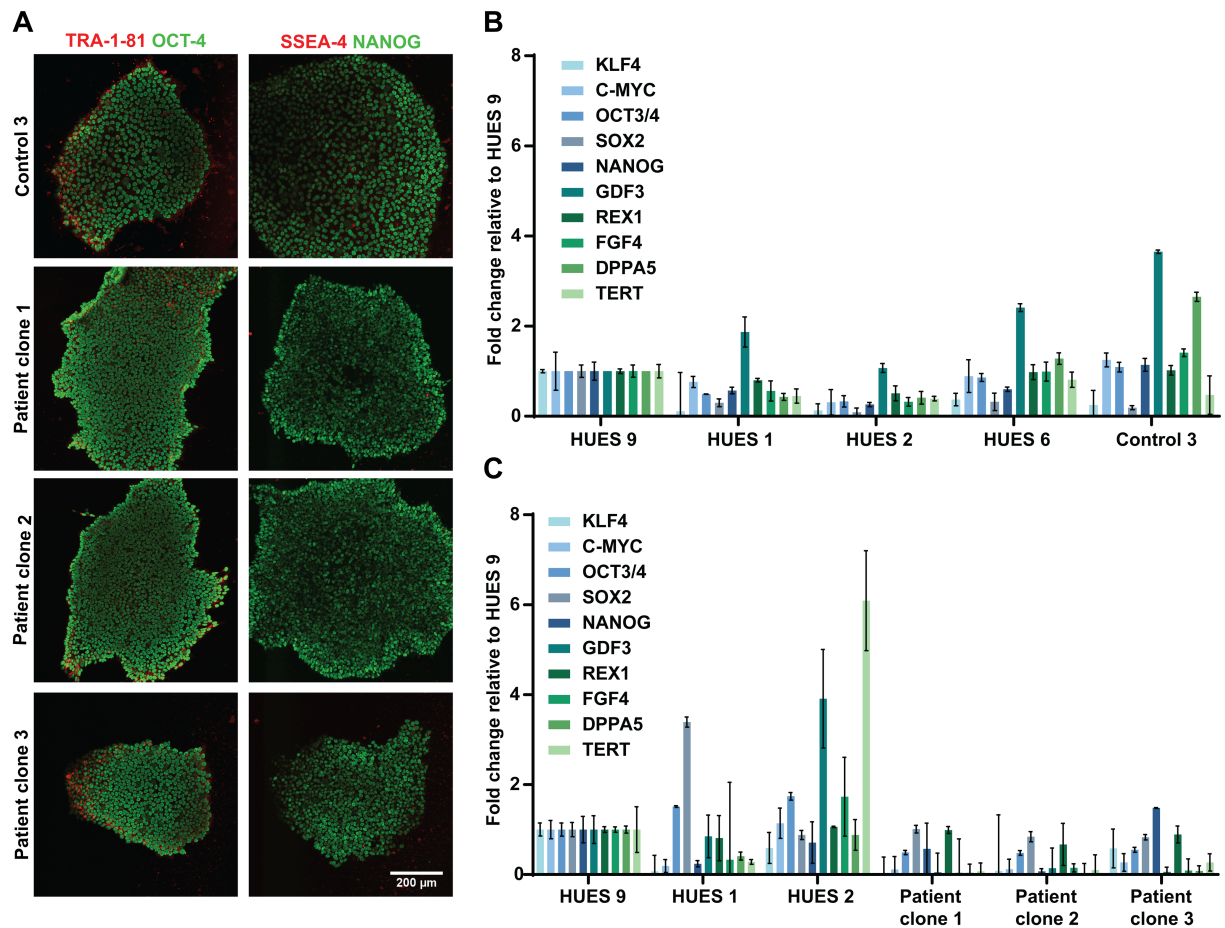

**Supplementary Figure 5: Characterisation of iPSC lines.** (A) Representative confocal images of pluripotency markers OCT4, TRA-1-81, NANOG, and SSEA-4 in control-3 and three iPSC clones from the *c.1424+5G>A LRP10*-variant carrying patient. (B) qPCR for pluripotency markers in control-3 in comparison to control lines HUES 9, 1, and 2. N = 3 technical replicates. (C) qPCR for pluripotency markers in the 3 clones derived from the *LRP10*-variant carrying patient in comparison to control lines HUES 9, 1, and 2. N = 3 technical replicates. All data are expressed as mean  $\pm$  SD.

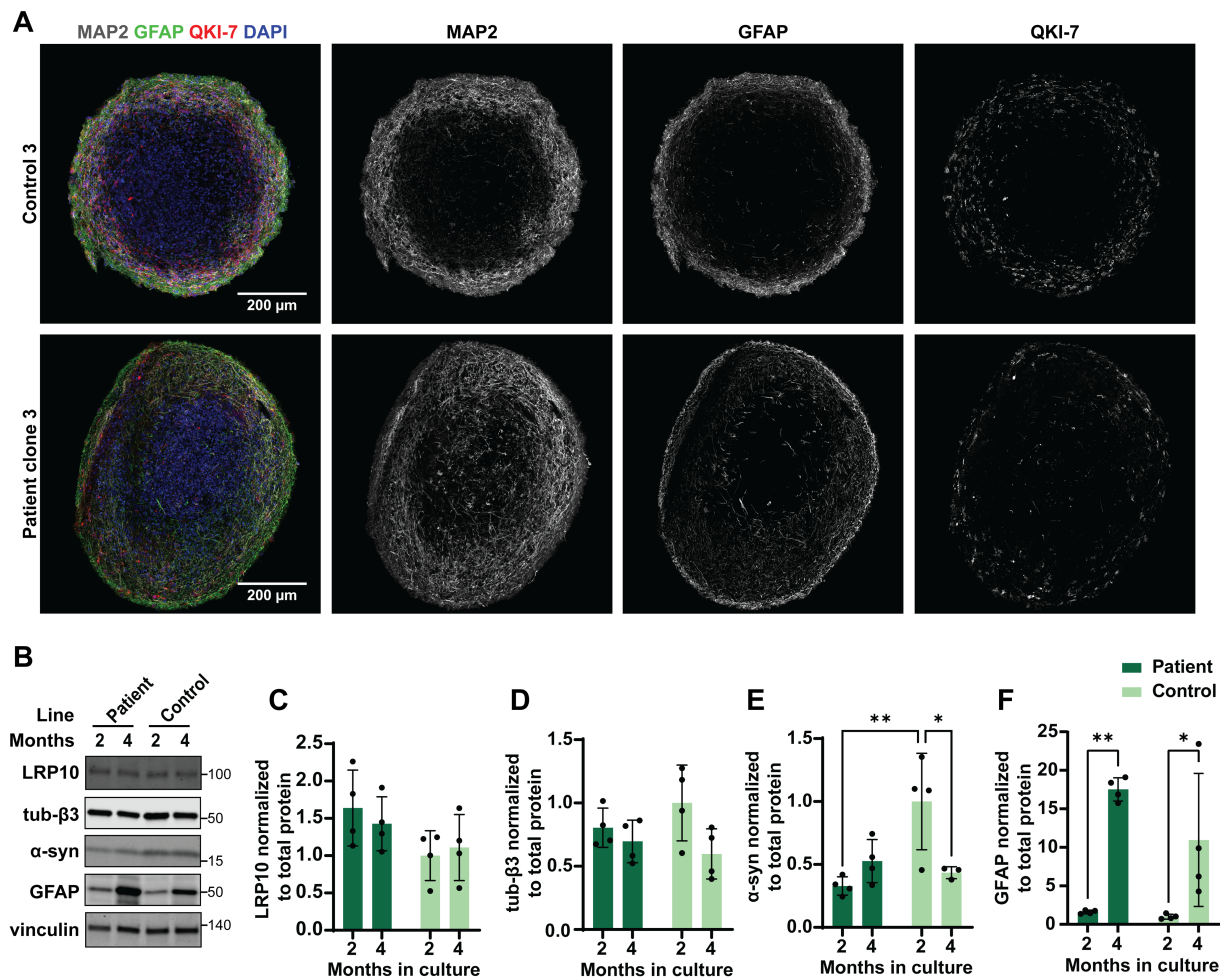

**Supplementary Figure 6: Characterisation of control-3 and LRP10<sup>splice</sup> patient clone-3 brain organoids.** (A) Representative tile scans of 4 months-old control-3 and patient clone-3 brain organoids showing the distribution of MAP2, GFAP, and QKI-7-positive cells. (B) Representative western blot of 2 and 4 months-old control and patient brain organoids probed for expression of LRP10, tubulin  $\beta$ 3,  $\alpha$ -synuclein, GFAP, and vinculin. (C-F) Quantifications of LRP10 (C), tubulin  $\beta$ 3 (D),  $\alpha$ -synuclein (E), and GFAP (F) normalised to total protein. N = 4 biological replicates. All data are expressed as mean  $\pm$  SD with individual data points shown. Data were analysed by Two-way ANOVA with Sidak's multiple comparisons test. \* $P \leq 0.05$ , \*\* $P \leq 0.01$ .



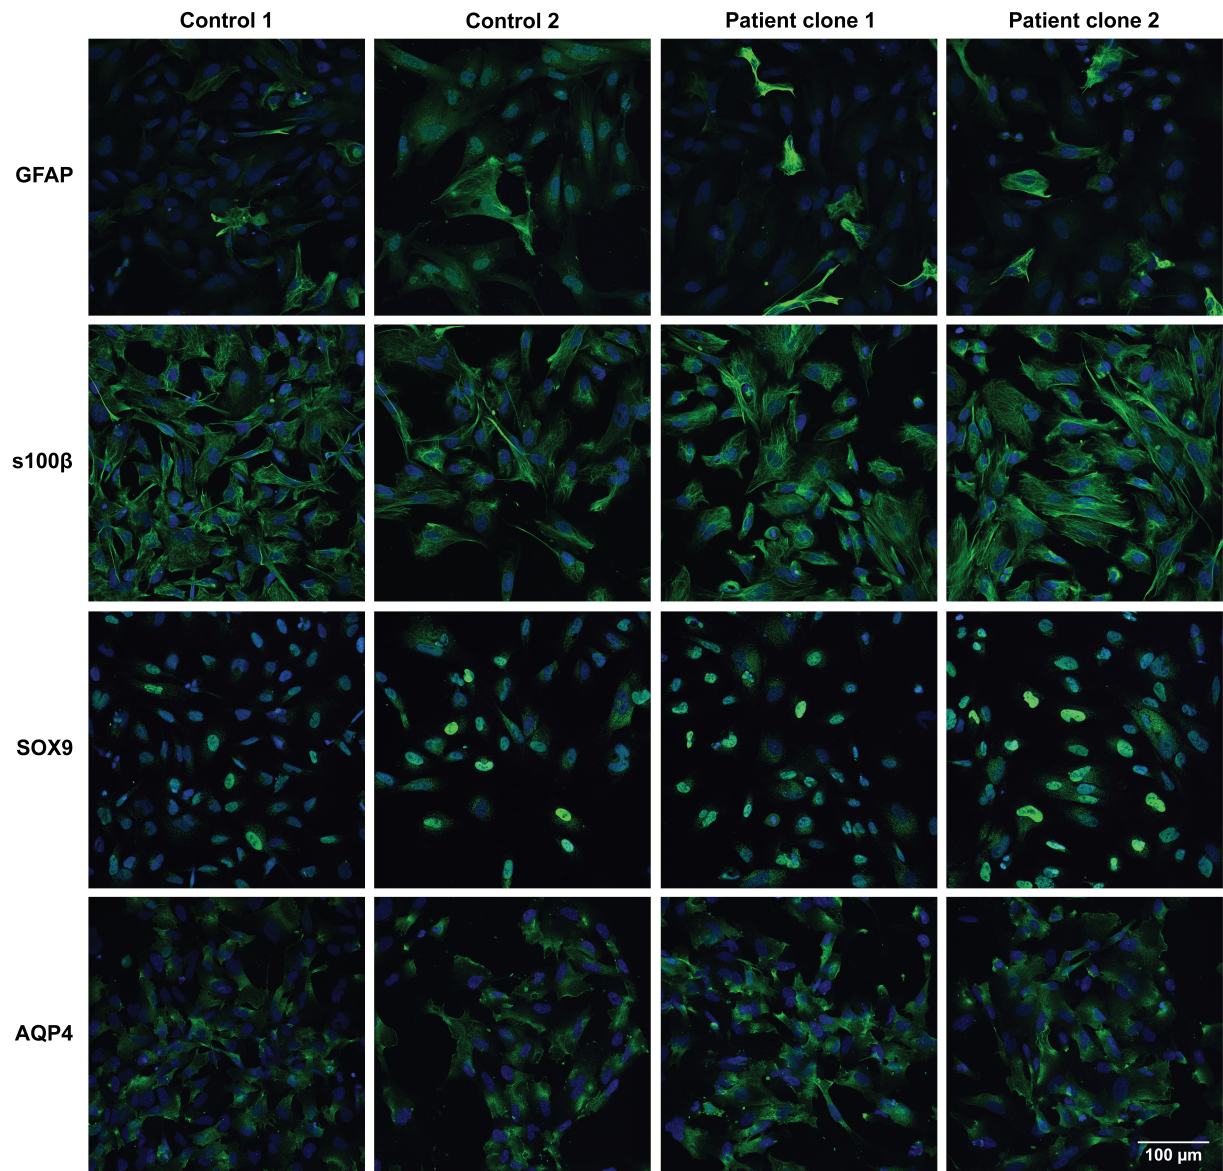

**Supplementary Figure 7: Characterisation of iPSC-derived astrocyte lines.** Representative confocal images of the astrocytic markers GFAP, s100β, SOX9 and AQP4 (in green) and DAPI (in blue) in 2 months-old iPSC-derived astrocytes from control lines 1 and 2, and patient clones 1 and 2.

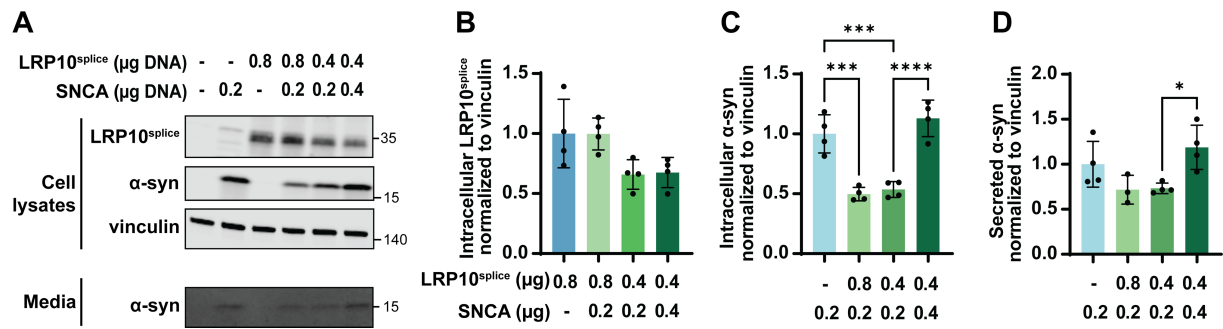

**Supplementary Figure 8: LRP10<sup>splice</sup> and α-synuclein overexpression in HEK-293T cells.**

(A) Representative western blot of cell lysates and conditioned media from HEK-293T overexpressing LRP10<sup>splice</sup> and α-synuclein. (B-D) Western blot quantifications of intracellular LRP10<sup>splice</sup> (B), intracellular α-synuclein (C), and secreted α-synuclein (D) normalised to intracellular vinculin. N = 4 biological replicates. All data are expressed as mean ± SD with individual data points shown. Data were analysed by One-way ANOVA with Tukey's multiple comparisons test. \* $P \leq 0.05$ , \*\*\* $P \leq 0.001$ , \*\*\*\* $P \leq 0.0001$ .
